# Supplementary material
Source: PubMed Central journal article supplement (PMC4978140)
Supplement: NIHMS768544-supplement-Broderick_Authorship_Form.pdf [file NIHMS768544-supplement-Broderick_Authorship_Form.pdf]

In:

**Verify Contributing Authorship**

**Warning! You must submit this page to verify your contribution to the submission.**

Print

*Barbara (Bonnie)  
Broderick*

*Santa Clara County  
Public Health  
Department*

If you are unable to complete your responses at this time, please click on the "Save for Later" button to save your work. To return to this page later, click on the "Return to this page later" link in the email that you were sent regarding this submission, or enter the URL and enter it in your browser's address bar.

<http://www.editorialmanager.com/tjacsm/l.asp?i=123471&l=531>

Please respond to the questions/statements below and click on the "Verify Contribution to Publication" button to complete your co-author verification for this publication.

If you do not submit your responses, your contribution will not be published. If you click on the "Save for Later" button, your contributing authorship information will be saved but you can return to this page later to complete your responses.

**RETAINED RIGHTS:** Except for copyright, other proprietary rights (e.g., patent or other rights to any process or procedure) shall be retained by the author. To reproduce any text, figures, tables, or illustrations from works of their own, the author must obtain written permission from WKH, Inc. ("WKH").

**ORIGINALITY:** Each author warrants that his or her submission to this journal does not infringe upon, violate, or misappropriate any copyright or other intellectual property rights, or any other proprietary right, contract or other right of a third party, and that he or she has full power to enter into this agreement. No similar work has been published nor shall be submitted elsewhere while under consideration by this Publication.

**AUTHORSHIP RESPONSIBILITY:** Each author warrants that he or she is sufficiently qualified in the intellectual content, the analysis of data, if applicable, of the Work to take public responsibility for it. Each has reviewed the Work, believes it represents valid work, and approves it for publication. Should the editors of the Publication request the data upon which they shall produce it.

**PREPRINTS:** Upon acceptance of the article for publication, each author will promptly remove any prior versions of this Work (normal or pre-proof) that may have been posted to an electronic server.

**DISCLAIMER:** Each author warrants that this Work contains no libelous statements and does not infringe or violate the publicity or privacy of any third party, libel or slander any third party, contain any scandalous, obscene, defamatory, or prepared information, or infringe or violate any other personal or intellectual property rights of others. Each author warrants that the Work does not contain any plagiarized or incorrectly attributed material. Each author warrants that the facts contained in the Work purporting to be facts are true, and any facts contained in the Work will not, if followed accurately, cause any damage to the user. If excerpts (e.g., text, figures, tables, illustrations, or files) from copyrighted works are included, a written release will be obtained from the author prior to submission, and credit to the original publication will be acknowledged. Each author further warrants that he or she has obtained the necessary written releases from patients whose names or likenesses are part of the Work. Should the Editor or WKH request copies of such releases, the author shall provide them in a timely manner.

**DISCLOSURES/CONFLICT OF INTEREST** Each author must identify any financial interests or affiliations with institutions, organizations, or companies that may have a conflict of interest with the Work by completing the form below. Additionally, any financial interests or affiliations with institutions, organizations, or companies that may have a conflict of interest with the Work must be disclosed in the manuscript.

involving a spouse, partner or children must be disclosed as well.

Note: Some sections below come from the ICMJE Uniform Disclosure of Conflicts of Interest at [http://www.icmje.org/downloads/coi\\_disclosure\\_2010](http://www.icmje.org/downloads/coi_disclosure_2010)).

Answer Required:  I agree

Did you or your institution at any time receive payment or support for any aspect of the submitted work (including but not limited to grants, honorarium, support for travel to meetings for the study or other participation in review activities such as data monitoring boards, steering committees, end point committees, and the like, payment for writing or review provision of writing assistance, medicines, equipment, or administration etc...)?

Answer Required: No

Other: Did you or your institution at any time receive additional payment or support of any kind for any aspect of the submitted work?

Character Count: 2

No

Please indicate whether you have financial relationships (regardless of compensation) with entities. You should report relationships that were present during the 36 months prior to submission including board membership, consulting, employment, expert testimony, grants/grants pending, payment for service on speakers bureaus, payment for manuscript preparation (pending or issued), royalties, payment for development of educational materials, stock/stock options, travel/accommodations/meeting expenses not listed (for example, if you report a consultancy above there is no payment related to that consultancy), etc.

Answer Required: No

Other (err on the side of full disclosure): Please indicate whether you have any additional financial relationships (regardless of amount of compensation) that were present during the 36 months prior to submission.

Character Count: 0

Other Relationships

Are there other relationships or activities that readers could perceive influenced, or that give the appearance of potentially influencing, submitted work?

Answer Required:

No other relationships/conditions/circumstances

AUTHOR'S OWN WORK: In consideration of WKH and American College of Sports Medicine's publication of the Work, the author hereby transfers, and conveys all his/her copyright ownership worldwide, in all language media now or hereafter known, including electronic media such as and Intranet, to American College of Sports Medicine. If American Medicine should decide for any reason not to publish the Work, American Sports Medicine shall give prompt notice of its decision to the author; this agreement shall terminate, and neither the author, WKH, nor Sports Medicine shall be under any further liability or obligation. Except for WKH and American College of Sports Medicine the rights to use his biographical data (including professional affiliation) in the Work or journal's promotion. Notwithstanding the foregoing, this paragraph and any transfer made pursuant to this paragraph shall be null and void if not accepted by WKH for publication, and (ii) the author chooses to be published by WKH as an open access publication.

WORK MADE FOR HIRE: If this Work or any element thereof has been prepared by another person or organization, or if it has been written as part of the duties of an employee, an authorized representative of the commissioning organization must also sign this form stating his or her title in the organization.

GOVERNMENT EMPLOYEES: If the Work or a portion of it has been prepared in the course of any author's employment by the United States Government, the author must check the "Government" box at the end of this form. A work prepared by a government employee as part of his or her official duties is called a "work of the U.S. Government" and is not subject to copyright. If it is not prepared as part of the employee's official duties, it may be subject to copyright.

INSTITUTIONAL REVIEW BOARD/ANIMAL CARE COMMITTEE APPROVAL: The author warrants that his or her institution has approved the protocol for research involving humans or animals and that all experimentation was conducted in accordance with ethical and humane principles of research.

WARRANTIES: Each author warrants that the work is original and that the author has the right to make the work available to American College of Sports Medicine, and the Editor; each author shall indemnify, and hold harmless those parties for any breach of such warranties.

Answer Required:

I agree

American College of Sports Medicine & Science in Sports & Exercise will permit the author(s) to retain the right to use a "final peer-reviewed manuscript" (the final manuscript after peer review acceptance for publication but prior to the publisher's copyediting, typesetting, and printing).

and other services) 12 months after publication of the final article personal web site, university's institutional repository or employer the following:

- \* You may only deposit the final peer-reviewed manuscript.
- \* You may not update the final peer-reviewed manuscript text or or with the final published version.
- \* You may not include the final peer-reviewed manuscript or any article on any commercial site or in any repository owned or operated by a commercial party. For authors of articles based on research funded by the National Institutes of Health ("NIH"), Wellcome Trust, Howard Hughes Medical Institute or other federal funding agency, see below for the services that WKH will provide to authors who comply with "Public Access Policy" guidelines.
- \* You may not display the final peer-reviewed manuscript until two weeks after the publication of the final article.
- \* You must attach the following notice to the final peer-reviewed manuscript or a non-final version of an article published in final form in (provide correct citation)".
- \* You shall provide a link in the final peer-reviewed manuscript to the Science in Sports & Exercise website.

Answer Required:  I agree

"Public Access Policy" Funding Disclosure  
Please disclose below if you have received funding for research on research based from any of the following organizations:

Instructions

- National Institutes of Health (NIH)
- Howard Hughes Medical Institute (HHMI)
- Wellcome Trust
- Research Councils UK (RCUK)
- Other - Please list in the following comments box

Select All Clear All

Please select:

Answer Required:

Any additional comments?

Character Count: 0

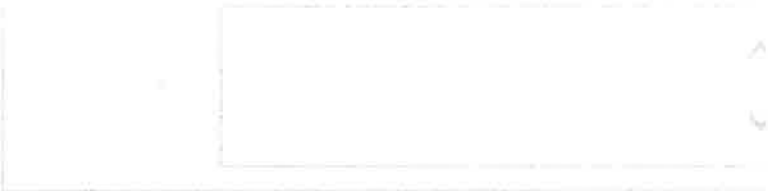

Compliance with RCUK and Wellcome Trust Open Access Policies

Both the Research Councils UK (RCUK) and the Wellcome Trust have policies regarding Open Access to articles that have been funded by grants from the Wellcome Trust. If either "Wellcome Trust" or "Research Councils UK" has been selected above, and the authors of the applicable article choose to publish the article as an open access publication, the following policies will apply:

\* If the article is to be published pursuant to the "Gold" route of Open Access, the RCUK and the Wellcome Trust require that WKH make the article immediately available pursuant to the Attribution 4.0 Creative Commons License at <http://creativecommons.org/licenses/by/4.0/legalcode> (the "CC BY License"). The CC BY License is the most accommodating of the Creative Commons licenses and allows others to distribute, remix, tweak, and build upon the article as long as they credit the authors for the original creation.

\* If the article is to be published pursuant to the "Green" route of Open Access, the RCUK and the Wellcome Trust require that WKH make the article available within six months pursuant to the Attribution- NonCommercial 4.0 License, currently found at <http://creativecommons.org/licenses/by-nc/4.0/> (the "CC BY-NC License"). The CC BY-NC License allows others to build upon the article non-commercially, and although their new work must acknowledge the authors for the original creation and be non-commercial, they do not have to license their derivative works on the same terms.

As a service to our authors, WKH will identify the National Library of Medicine (NLM) articles that require deposit pursuant to the RCUK and Wellcome Trust policies described in this section. This Copyright Transfer Agreement provides the mechanism for identifying such articles.

WKH will transmit the final peer-reviewed manuscript of an article funded in whole or in part by either RCUK or the Wellcome Trust to the appropriate funding agency.

Upon NIH request, it remains the legal responsibility of the author to ensure the provenance of his/her manuscript for purposes of deposit. Authors must submit articles to WKH. Author will not alter the final peer-reviewed manuscript transmitted to NIH.

With respect to the "Green" route of Open Access, author will not make the final peer-reviewed manuscript prior to 6 months following the final article.

Authors of articles that have been funded from grants from the RCUK and Wellcome Trust are required to sign the WKH Open Access License Agreement for the applicable article. Please contact the Editorial Office of the journal to receive the Open Access License Agreement that is to be signed in connection with the publication of the article.

I agree

I am the person in question for this submission or otherwise have authority to sign this agreement.

Answer Required:  I agree

CME/CE Disclosure

Each author must identify and disclose any financial associations in partner or children by completing the Family Disclosure question to any off-label uses or unapproved drugs or devices are discussed in by completing the Off-Label Use/Unapproved Drugs or Products question. If the Work is published as a continuing education or continuing education article, this information will be provided to the accreditation included in the published article. When applicable, articles accepted need to comply with additional standards related to CME or CE accreditation refer to guidelines for authors for details. WKH and its affiliates will publish the manuscript as a continuing education article.

Answer Required:  I agree

Family Disclosure

Do your children or your spouse or partner have financial relationships that have an interest in the content of the submitted work?

Answer Required:

Off-Label Use/Unapproved Drugs or Products

If your manuscript discusses an unlabeled use of a commercial product or investigational use of a product or device not yet approved by the FDA, you must specifically disclose in the manuscript that the product is under discussion or that the product is still investigational. Please indicate below that applies to you

Answer Required:
